# Supplementary material
Source: HighWire-hosted journal article supplement (https://bmjopen.bmj.com/content/10/4/e032268)
Supplement: inline-supplementary-material-1 [file inline-supplementary-material-1.pdf]

## SUPPLEMENTARY INFORMATION

**Sex- and age-specific characteristics of body composition and its effect on bone mineral density in southern Chinese adults: a cross-sectional study**

Zeyu Xiao <sup>a, b, c</sup>, Zhiqiang Tan <sup>a, c</sup>, Jingjie Shang <sup>a, c</sup>, Yong Cheng <sup>a, c</sup>, Yongjin Tang <sup>a, c</sup>,

Bin Guo <sup>a, c</sup>, Jian Gong <sup>a, c</sup>, Hao Xu <sup>a, c, \*</sup>

<sup>a</sup> Molecular Imaging Institute, the First Affiliated Hospital, Jinan University, Guangzhou, PR China

<sup>b</sup> Department of Radiology, The First Affiliated Hospital of Jinan University, Guangzhou, Guangdong, China

<sup>c</sup> Department of Nuclear Medicine, The First Affiliated Hospital of Jinan University, Guangzhou, Guangdong, China

Keywords: body composition; aging; bone mineral density; fat distribution; appendicular lean mass.

\* Corresponding author: Hao Xu.

Table S1. Pearson’s correlation between study variables in males <50years

|         | Age      | Height  | Weight  | BMI     | WBLM    | WBFM    | Fat%    | A/G FMR | ALM     | WBBMD   | LSBMD   | FNBMD   |
|---------|----------|---------|---------|---------|---------|---------|---------|---------|---------|---------|---------|---------|
| Height  | -.092*   |         |         |         |         |         |         |         |         |         |         |         |
| Weight  | .161***  | .460*** |         |         |         |         |         |         |         |         |         |         |
| BMI     | .216***  | .126*** | .917*** |         |         |         |         |         |         |         |         |         |
| WBLM    | .083*    | .571*** | .851*** | .706*** |         |         |         |         |         |         |         |         |
| WBFM    | .189***  | .265*** | .905*** | .893*** | .549*** |         |         |         |         |         |         |         |
| Fat%    | .207***  | .155*** | .788*** | .810*** | .364*** | .962*** |         |         |         |         |         |         |
| A/G FMR | .407***  | .062    | .594*** | .641*** | .363*** | .656*** | .667*** |         |         |         |         |         |
| ALM     | .005     | .555*** | .822*** | .681*** | .950*** | .541*** | .372*** | .308*** |         |         |         |         |
| WBBMD   | .101**   | .306*** | .610*** | .547*** | .567*** | .489*** | .407*** | .318*** | .569*** |         |         |         |
| LSBMD   | -.019    | .245*** | .358*** | .294*** | .355*** | .258*** | .203*** | .096*** | .375*** | .741*** |         |         |
| FNBMD   | -.127*** | .274*** | .394*** | .314*** | .423*** | .266*** | .182*** | .089*** | .438*** | .718*** | .662*** |         |
| THBMD   | .017     | .232*** | .495*** | .443*** | .500*** | .363*** | .280*** | .226*** | .513*** | .842*** | .696*** | .872*** |

*Note.* Results expressed as *r* coefficients. BMI, body mass index; WBLM, whole body lean mass; WBFM, whole body fat mass; Fat%, percentage of body fat mass; FM, fat mass; A/G FMR, android/gynoid fat mass ratio; ALM, appendicular lean mass; WBBMD, whole body bone mineral density; LSBMD, lumbar spine bone mineral density; FNBMD, femoral neck bone mineral density; THBMD, total hip bone mineral density.

\**P* < 0.05; \*\**P* < 0.05; \*\*\**P* < 0.001.

Table S2. Pearson’s correlation between study variables in males ≥50years

|        | Age      | Height  | Weight  | BMI     | WBLM    | WBFM    | Fat%    | A/G FMR | ALM     | WBBMD   | LSBMD   | FNBMD   |
|--------|----------|---------|---------|---------|---------|---------|---------|---------|---------|---------|---------|---------|
| Height | -.165*** |         |         |         |         |         |         |         |         |         |         |         |
| Weight | -.212*** | .511*** |         |         |         |         |         |         |         |         |         |         |
| BMI    | -.160*** | .087*** | .898*** |         |         |         |         |         |         |         |         |         |
| WBLM   | -.355*** | .581*** | .835*** | .671*** |         |         |         |         |         |         |         |         |
| WBFM   | -.016    | .287*** | .860*** | .850*** | .438*** |         |         |         |         |         |         |         |
| Fat%   | .089**   | .125*** | .668*** | .717*** | .162*** | .941*** |         |         |         |         |         |         |
| A/G    | .042     | .028    | .446*** | .505*** | .198*** | .548*** | .575*** |         |         |         |         |         |
| ALM    | -.385    | .546*** | .807*** | .658*** | .945*** | .442*** | .191*** | .164*** |         |         |         |         |
| WBBMD  | -.180*** | .307*** | .545*** | .479*** | .501*** | .395*** | .280*** | .193*** | .499*** |         |         |         |
| LSBMD  | -.035    | .230*** | .451*** | .407*** | .352*** | .381*** | .307*** | .203*** | .356*** | .770*** |         |         |
| FNBMD  | -.354*** | .291*** | .447*** | .373*** | .459*** | .281*** | .172*** | .077*** | .466*** | .760*** | .631*** |         |
| THBMD  | -.267*** | .235*** | .473*** | .433*** | .456*** | .323*** | .221*** | .134*** | .471*** | .847*** | .702*** | .913*** |

*Note.* Results expressed as *r* coefficients. BMI, body mass index; WBLM, whole body lean mass; WBFM, whole body fat mass; Fat%, percentage of body fat mass; FM, fat mass; A/G FMR, android/gynoid fat mass ratio; ALM, appendicular lean mass; WBBMD, whole body bone mineral density; LSBMD, lumbar spine bone mineral density; FNBMD, femoral neck bone mineral density; THBMD, total hip bone mineral density.

\**P* < 0.05; \*\**P* < 0.05; \*\*\**P* < 0.001.

Table S3. Pearson’s correlation between study variables in premenopausal females

|        | Age     | Height  | Weight  | BMI     | WBLM    | WBFM    | Fat%    | A/G FMR | ALM     | WBBMD   | LSBMD   | FNBMD   |
|--------|---------|---------|---------|---------|---------|---------|---------|---------|---------|---------|---------|---------|
| Height | -.031   |         |         |         |         |         |         |         |         |         |         |         |
| Weight | .222*** | .424*** |         |         |         |         |         |         |         |         |         |         |
| BMI    | .260*** | .072*** | .932*** |         |         |         |         |         |         |         |         |         |
| WBLM   | .217*   | .510*** | .795*** | .671**  |         |         |         |         |         |         |         |         |
| WBFM   | .166*** | .246*** | .896*** | .890*** | .445*** |         |         |         |         |         |         |         |
| Fat%   | .116*** | .078*** | .656*** | .697*** | .084*** | .909*** |         |         |         |         |         |         |
| A/G    | .261*** | .002    | .449*** | .494*** | .251*** | .489*** | .465*** |         |         |         |         |         |
| ALM    | .153*** | .519*** | .769*** | .640*** | .947*** | .444*** | .111*** | .181*** |         |         |         |         |
| WBBMD  | .230**  | .200*** | .453*** | .423*** | .444*** | .314*** | .142*** | .022    | .434*** |         |         |         |
| LSBMD  | .053*   | .179*** | .347*** | .315*** | .285*** | .276*** | .175*** | .000    | .299*** | .775*** |         |         |
| FNBMD  | .028    | .181*** | .316*** | .281*** | .309*** | .218*** | .095*** | -.009   | .323*** | .704*** | .661*** |         |
| THBMD  | .126*** | .111*** | .361*** | .358*** | .355*** | .249*** | .112*** | .043    | .363*** | .814*** | .714*** | .894*** |

*Note.* Results expressed as *r* coefficients. BMI, body mass index; WBLM, whole body lean mass; WBFM, whole body fat mass; Fat%, percentage of body fat mass; FM, fat mass; A/G FMR, android/gynoid fat mass ratio; ALM, appendicular lean mass; WBBMD, whole body bone mineral density; LSBMD, lumbar spine bone mineral density; FNBMD, femoral neck bone mineral density; THBMD, total hip bone mineral density.

\**P* < 0.05; \*\**P* < 0.05; \*\*\**P* < 0.001.

Table S4. Pearson’s correlation between study variables in postmenopausal females

|        | Age      | Height  | Weight  | BMI     | WBLM    | WBFM    | Fat%    | A/G FMR  | ALM     | WBBMD   | LSBMD   | FNBMd   |
|--------|----------|---------|---------|---------|---------|---------|---------|----------|---------|---------|---------|---------|
| Height | -.285*** |         |         |         |         |         |         |          |         |         |         |         |
| Weight | -.129*** | .452*** |         |         |         |         |         |          |         |         |         |         |
| BMI    | -.011    | .038    | .905*** |         |         |         |         |          |         |         |         |         |
| WBLM   | -.172*** | .542*** | .774*** | .608*** |         |         |         |          |         |         |         |         |
| WBFM   | -.050*   | .273*** | .909*** | .889*** | .442*** |         |         |          |         |         |         |         |
| Fat%   | .022     | .098*** | .703*** | .746*** | .113*** | .924*** |         |          |         |         |         |         |
| A/G    | .204***  | -.049*  | .300*** | .359*** | .193*** | .311*** | .315*** |          |         |         |         |         |
| ALM    | -.253*** | .538*** | .729*** | .558*** | .907*** | .435*** | .139*** | .076***  |         |         |         |         |
| WBBMD  | -.413*** | .332*** | .474*** | .374*** | .419*** | .361*** | .226*** | -.075*** | .436*** |         |         |         |
| LSBMD  | -.281*** | .299*** | .421*** | .330*** | .345*** | .339*** | .236*** | -.201    | .354*** | .824*** |         |         |
| FNBMd  | -.501*** | .336*** | .375*** | .260*** | .344*** | .275*** | .168*** | -.091*** | .387*** | .785*** | .668*** |         |
| THBMD  | -.442*** | .277*** | .423*** | .344*** | .370*** | .327*** | .218*** | -.021    | .408*** | .839*** | .720*** | .912*** |

*Note.* Results expressed as *r* coefficients. BMI, body mass index; WBLM, whole body lean mass; WBFM, whole body fat mass; Fat%, percentage of body fat mass; FM, fat mass; A/G FMR, android/gynoid fat mass ratio; ALM, appendicular lean mass; WBBMD, whole body bone mineral density; LSBMD, lumbar spine bone mineral density; FNBMd, femoral neck bone mineral density; THBMD, total hip bone mineral density.

\**P* < 0.05; \*\**P* < 0.05; \*\*\**P* < 0.001.
